# Supplementary material for: Generating 3D architectured nature-inspired materials and granular media using diffusion models based on language cues
Source: PubMed Central journal article supplement (PMC9767007; doi:10.1093/oxfmat/itac010), 2022-11-11
Supplement: itac010_supplementary_data.pdf [file itac010_supplementary_data.pdf]

# Generating 3D architected nature-inspired materials and granular media using diffusion models based on language cues

Markus J. Buehler<sup>1,2\*</sup>

<sup>1</sup> Laboratory for Atomistic and Molecular Mechanics (LAMM), Massachusetts Institute of Technology, 77 Massachusetts Ave., Cambridge, MA 02139, USA

<sup>2</sup> Center for Computational Science and Engineering, Schwarzman College of Computing, Massachusetts Institute of Technology, 77 Massachusetts Ave., Cambridge, MA 02139, USA

[\\*mbuehler@MIT.EDU](mailto:mbuehler@MIT.EDU)

## SUPPLEMENTARY INFORMATION

## Movies

All movies as one ZIP file: <https://www.dropbox.com/s/vo3uvphu8pbtwrv/MOVIES%20M1-M6.zip?dl=0>

**Movie M1:** Interpolation across two text prompts, generating 512 frames and rendered as a movie.  
<https://www.dropbox.com/s/20k66xiybsr1gzi/M1.mp4?dl=0>

**Movie M2:** High-speed recording of dropping granular media designed using the Stable Diffusion method into a glass container (10x slow-down).  
[https://www.dropbox.com/s/q8a9srn8e8h0wu1/M2\\_round\\_drop.mp4?dl=0](https://www.dropbox.com/s/q8a9srn8e8h0wu1/M2_round_drop.mp4?dl=0)

**Movie M3:** High-speed recording of dropping granular media designed using the Stable Diffusion method into a glass container, this time for a mix of all three types of particles combine into one complex “liquid” (10x slow-down).  
[https://www.dropbox.com/s/qjqq5f615q7jhcc/M3\\_mix\\_drop.mp4?dl=0](https://www.dropbox.com/s/qjqq5f615q7jhcc/M3_mix_drop.mp4?dl=0)

**Movie M4:** High-speed recording of dropping granular media under shaking deformation in a glass container. The liquid-like behavior can easily be confirmed (10x slow-down).  
[https://www.dropbox.com/s/69le43elj6xt43/M4\\_mix\\_motions.mp4?dl=0](https://www.dropbox.com/s/69le43elj6xt43/M4_mix_motions.mp4?dl=0)

**Movie M5:** Tensile deformation simulation of the material designed as described in **Figure 13**.  
<https://www.dropbox.com/s/9chyzyc7p2lmjfe/M5.mp4?dl=0>

**Movie M6:** Recording of the additive manufacturing process, for a variety of samples generated here.  
[https://www.dropbox.com/s/op83t8xivzsw6rl/M6\\_additive\\_manufacturing.mp4?dl=0](https://www.dropbox.com/s/op83t8xivzsw6rl/M6_additive_manufacturing.mp4?dl=0)

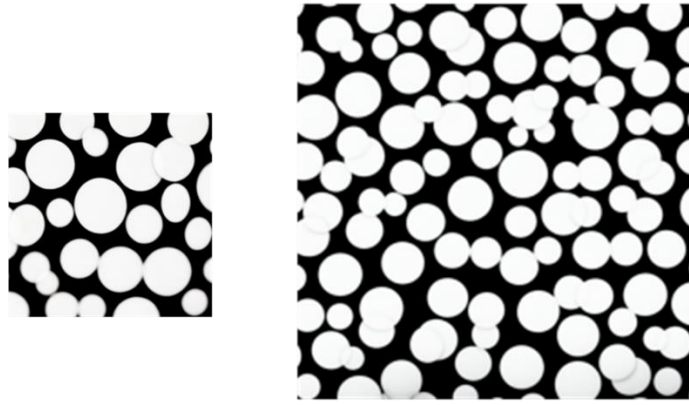

**Figure S1:** Comparison of generation at 512x512 pixels (left) vs. 1024x1024 pixels (right).

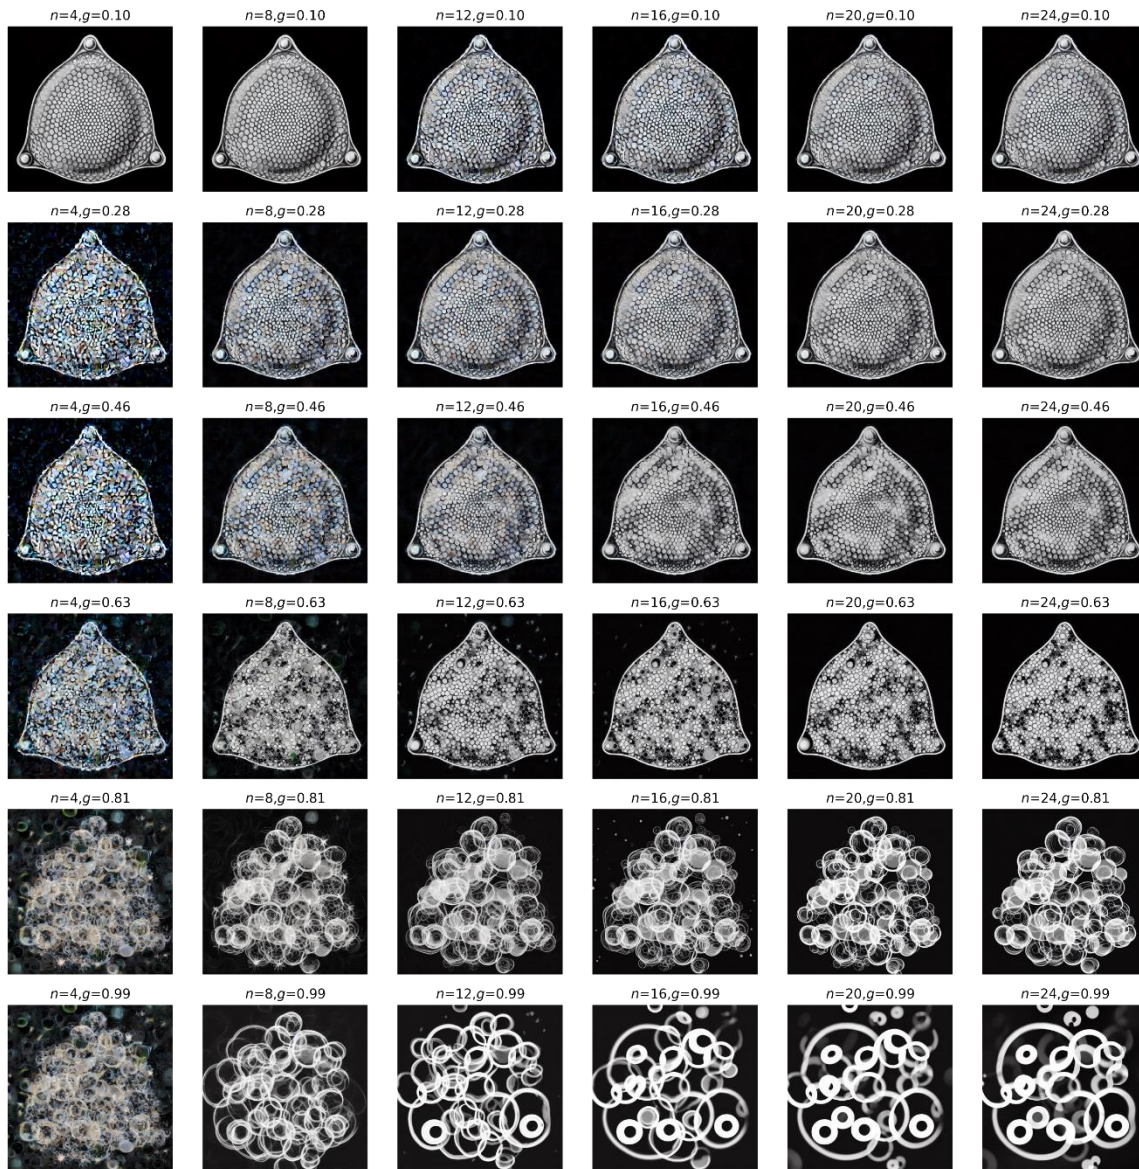

**Figure S2:** Variation of inference steps  $n$  and strength, while using the same image prompt as input as shown in **Figure 10a**. The text prompt is  $T_1$ ="several small white circles on black background". Other constant parameters  $p = (S = 33)$ .

a

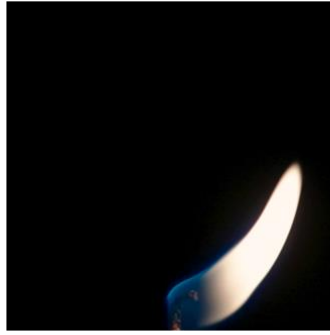

b

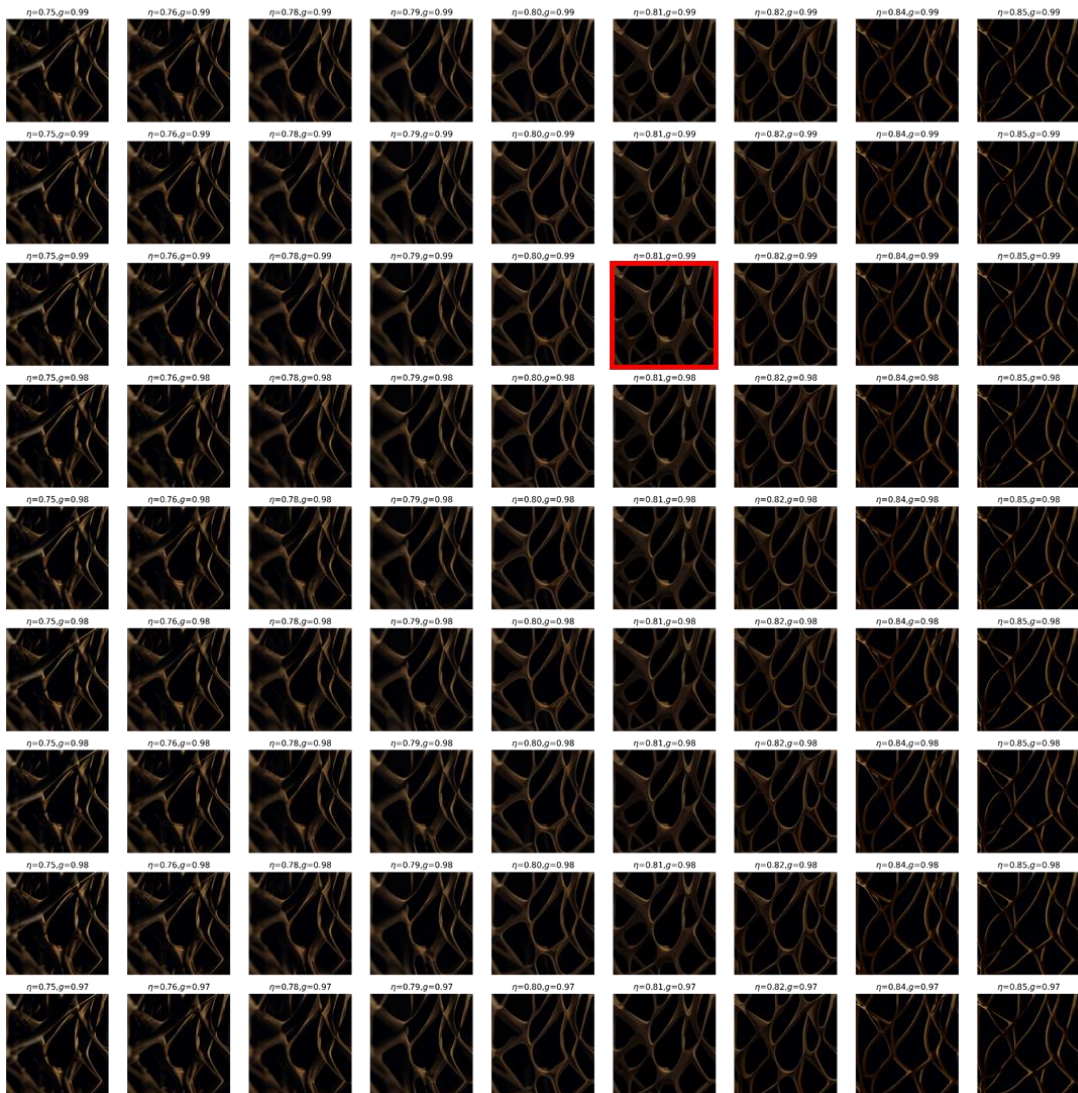

**Figure S3:** Candle based design. Text prompts are  $T_1$ ="a spider web with thick lines on black background" and  $T_2$ ="the internal details of wood microstructure". Other constant parameters  $p = (S = 33, \lambda = 0.25)$ .
